# Supplementary material for: Treatment-free survival over extended follow-up of patients with advanced melanoma treated with immune checkpoint inhibitors in CheckMate 067
Source: PubMed Central journal article supplement — J Immunother Cancer. 2021 Nov 19;9(11):e003743. doi: 10.1136/jitc-2021-003743 (PMC8606772; doi:10.1136/jitc-2021-003743), 2021-11-19
Supplement: jitc-2021-003743supp001.pdf [file jitc-2021-003743supp001.pdf]

**SUPPLEMENT****Treatment-free survival over extended follow-up of patients with advanced melanoma treated with immune checkpoint inhibitors in CheckMate 067**

Meredith M. Regan,<sup>1,2</sup> Charlene M. Mantia,<sup>1,2</sup> Lillian Werner,<sup>1</sup> Ahmad A. Tarhini,<sup>3</sup> James Larkin,<sup>4</sup> F. Stephen Hodi,<sup>1,2</sup> Jedd D. Wolchok,<sup>5,6</sup> Michael A. Postow,<sup>5,6</sup> Brian Stwalley,<sup>7</sup> Andriy Moshyk,<sup>7</sup> Corey Ritchings,<sup>7</sup> Sandra Re,<sup>7</sup> Wim van Dijck,<sup>8</sup> David F. McDermott,<sup>2,9\*</sup> Michael B. Atkins<sup>10\*</sup>

<sup>1</sup>Dana-Farber Cancer Institute, Boston, MA, USA; <sup>2</sup>Harvard Medical School, Boston, MA, USA; <sup>3</sup>H. Lee Moffitt Cancer Center and Research Institute, Tampa, FL, USA; <sup>4</sup>The Royal Marsden NHS Foundation Trust, London, United Kingdom; <sup>5</sup>Memorial Sloan Kettering Cancer Center, New York, NY, USA; <sup>6</sup>Weill Cornell Medical College, New York, NY, USA; <sup>7</sup>Bristol-Myers Squibb, Princeton, NJ, USA; <sup>8</sup>Bristol Myers Squibb Braine-l'Alleud, Belgium; <sup>9</sup>Beth Israel Deaconess Medical Center, Boston, MA, USA; <sup>10</sup>Georgetown Lombardi Comprehensive Cancer Center, Washington, DC, USA

\*Shared senior authorship

**Table S1** Number of endpoint events, Kaplan–Meier estimates of 60-month event-free proportions, and 60-month mean times by treatment assignment

|                                                 |                                        | Treatment assignment      |           |            |
|-------------------------------------------------|----------------------------------------|---------------------------|-----------|------------|
|                                                 |                                        | Nivolumab plus ipilimumab | Nivolumab | Ipilimumab |
| Number patients who initiated therapy           |                                        | 313                       | 313       | 311        |
| OS*                                             | Number of events                       | 151                       | 175       | 228        |
|                                                 | KM estimate event-free at 60 months, % | 52                        | 44        | 27         |
|                                                 | 60-month mean time, months†            | 38.6                      | 36.1      | 28.4       |
| Time to subsequent therapy initiation or death‡ | Number of events                       | 179                       | 209       | 273        |
|                                                 | KM estimate event-free at 60 months, % | 43                        | 33        | 11         |
|                                                 | 60-month mean time, months†            | 32.0                      | 26.8      | 14.5       |
| Time to protocol therapy cessation§             | Number of events                       | 301                       | 289       | 311        |
|                                                 | KM estimate event-free at 60 months, % | 4                         | 9         | 0          |
|                                                 | 60-month mean time, months†            | 12.3                      | 16.9      | 2.6        |

\*Defined as the time from randomization until death from any cause or until censoring on the date last known alive.

†Interpreted as follows: on average, patients assigned to treatment X survived Y months of the 60-month period from randomization; on average, patients assigned to treatment X survived without initiating subsequent therapy Y months of the 60-month period from randomization; on average, patients assigned to treatment X were on protocol therapy Y months of the 60-month period from randomization.

‡Defined as the time from randomization until initiation of subsequent systemic anticancer therapy or death, whichever occurred first, or until censoring on the date last known alive and free of subsequent therapy.

§Defined as the time from randomization until cessation of protocol therapy or until censoring on the date last known alive on protocol therapy.

KM, Kaplan–Meier; OS, overall survival.

**Table S2** Kaplan–Meier estimates of percentages of patients surviving free from subsequent therapy initiation, free from protocol therapy cessation, and treatment-free at 24, 36, 48, and 60 months\*

| Time since randomization, months | Event-free survival period                 | Treatment assignment      |           |            |
|----------------------------------|--------------------------------------------|---------------------------|-----------|------------|
|                                  |                                            | Nivolumab plus ipilimumab | Nivolumab | Ipilimumab |
| 24                               | Free from subsequent therapy initiation, % | 50                        | 42        | 17         |
|                                  | Free from protocol therapy cessation, %    | 21                        | 27        | 0          |
|                                  | Treatment-free, %                          | 29                        | 15        | 17         |
| 36                               | Free from subsequent therapy initiation, % | 46                        | 36        | 15         |
|                                  | Free from protocol therapy cessation, %    | 12                        | 17        | 0          |
|                                  | Treatment-free, %                          | 34                        | 19        | 15         |
| 48                               | Free from subsequent therapy initiation, % | 44                        | 35        | 12         |
|                                  | Free from protocol therapy cessation, %    | 6                         | 11        | 0          |
|                                  | Treatment-free, %                          | 38                        | 24        | 12         |
| 60                               | Free from subsequent therapy initiation, % | 43                        | 33        | 11         |
|                                  | Free from protocol therapy cessation, %    | 4                         | 9         | 0          |
|                                  | Treatment-free, %                          | 39                        | 24        | 11         |

\*Estimated by the differences in Kaplan–Meier estimates of the two defining endpoints.

**Figure S1** Kaplan–Meier estimates of endpoints, TFS, and survival states characterizing how overall time was spent over the 60-month follow-up period from randomization. Toxicity was defined as grade  $\geq 3$  select TRAEs (i.e., those of potential immunologic etiology). OS, overall survival; TFS, treatment-free survival; TRAE, treatment-related adverse event.

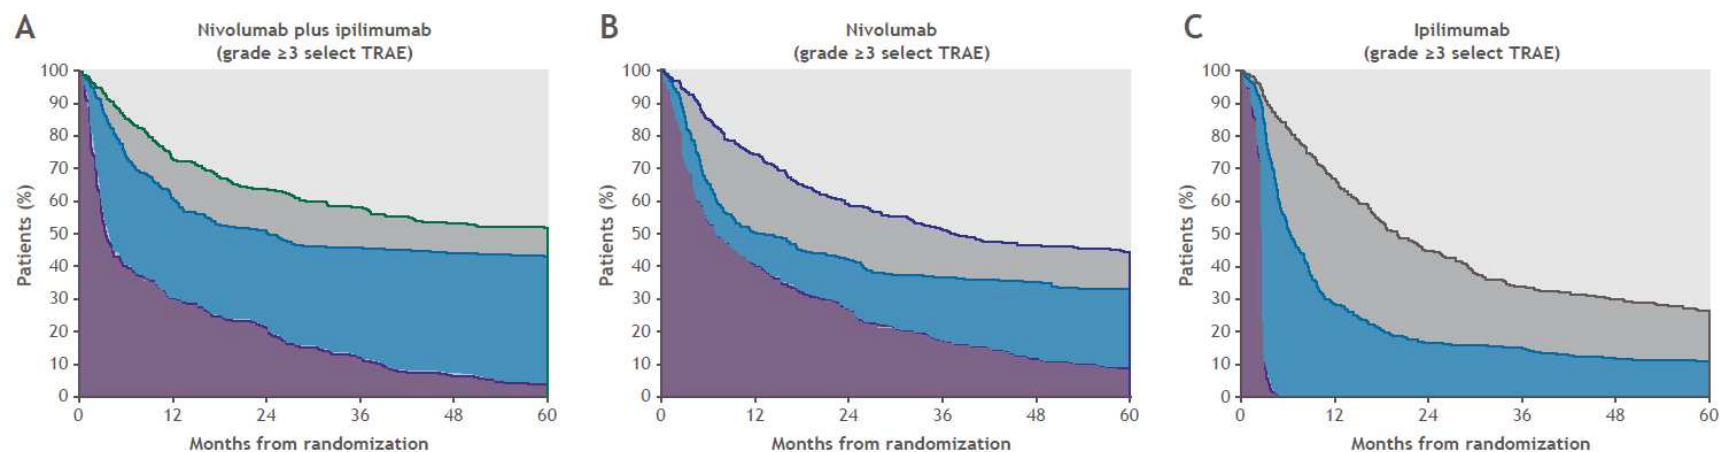

| Survival state                               | Nivolumab plus ipilimumab  |                    | Nivolumab                  |                    | Nivolumab plus ipilimumab vs nivolumab | Ipilimumab                 |                    | Nivolumab plus ipilimumab vs ipilimumab |
|----------------------------------------------|----------------------------|--------------------|----------------------------|--------------------|----------------------------------------|----------------------------|--------------------|-----------------------------------------|
|                                              | 60-month mean time, months | 60-month period, % | 60-month mean time, months | 60-month period, % | Difference (95% CI), months            | 60-month mean time, months | 60-month period, % | Difference (95% CI), months             |
| OS                                           | 38.6                       | 64                 | 36.1                       | 60                 | 2.5 (-1.1 to 6.2)                      | 28.4                       | 47                 | 10.2 (6.6 to 13.9)                      |
| Survival after subsequent therapy initiation | 6.6                        | 11                 | 9.3                        | 15                 | -2.7 (-4.9 to -0.4)                    | 13.9                       | 23                 | -7.3 (-9.8 to -4.8)                     |
| TFS                                          | 19.7                       | 33                 | 9.9                        | 17                 | 9.8 (6.7 to 12.8)                      | 11.9                       | 20                 | 7.8 (4.6 to 11.0)                       |
| Without grade $\geq 3$ select TRAE           | 19.0                       | 32                 | 9.5                        | 16                 | 9.5 (6.5 to 12.5)                      | 11.8                       | 20                 | 7.3 (4.1 to 10.4)                       |
| With grade $\geq 3$ select TRAE              | 0.7                        | 1                  | 0.4                        | 1                  | 0.2 (-0.4 to 0.9)                      | 0.1                        | <1                 | 0.5 (0 to 1.0)                          |
| Time on protocol therapy                     | 12.3                       | 21                 | 16.9                       | 28                 | -4.6 (-7.3 to -1.8)                    | 2.6                        | 4                  | 9.8 (7.9 to 11.6)                       |
| With grade $\geq 3$ select TRAE              | 0.3                        | <1                 | 0.4                        | 1                  | -0.2 (-0.9 to 0.5)                     | 0.0                        | <1                 | 0.2 (0 to 0.4)                          |
| Without grade $\geq 3$ select TRAE           | 12.1                       | 20                 | 16.5                       | 27                 | -4.4 (-7.1 to -1.7)                    | 2.5                        | 4                  | 9.5 (7.7 to 11.4)                       |

**Figure S2** Kaplan–Meier estimates of endpoints, TFS, and survival states characterizing how overall survival time was spent over the 60-month follow-up period from randomization. Toxicity was defined as grade  $\geq 2$  TRAEs. OS, overall survival; TFS, treatment-free survival; TRAE, treatment-related adverse event.

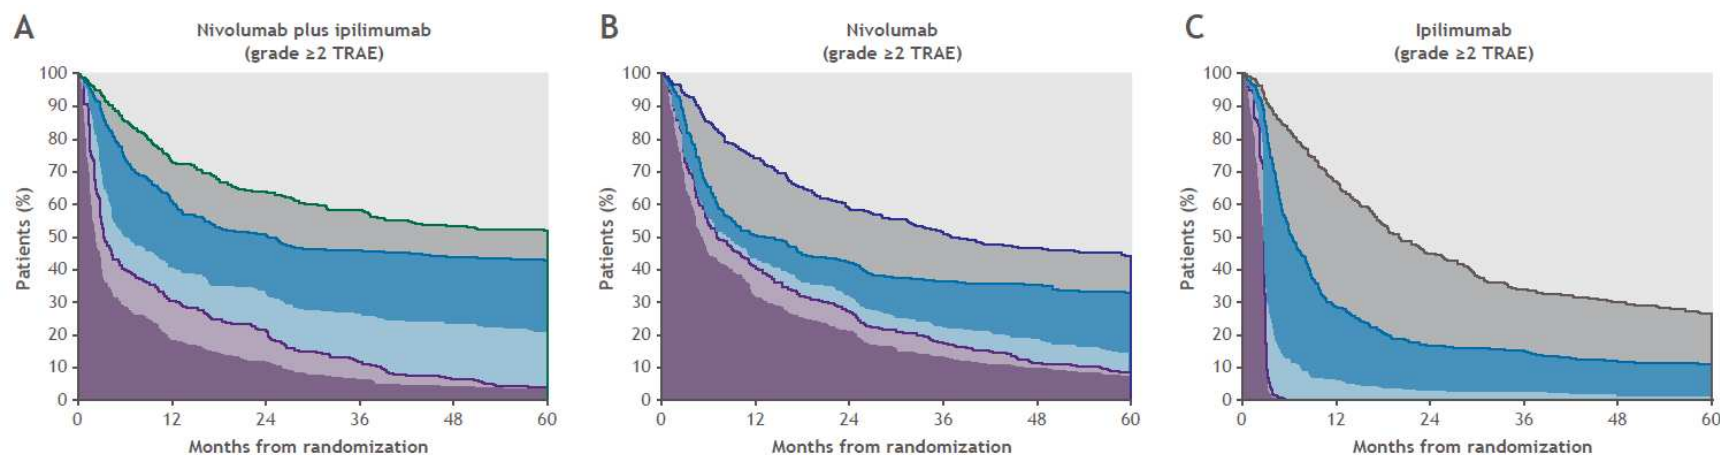

| Survival state                               | Nivolumab plus ipilimumab  |                    | Nivolumab                  |                    | Nivolumab plus ipilimumab vs nivolumab<br>Difference (95% CI), months | Ipilimumab                 |                    | Nivolumab plus ipilimumab vs ipilimumab<br>Difference (95% CI), months |
|----------------------------------------------|----------------------------|--------------------|----------------------------|--------------------|-----------------------------------------------------------------------|----------------------------|--------------------|------------------------------------------------------------------------|
|                                              | 60-month mean time, months | 60-month period, % | 60-month mean time, months | 60-month period, % |                                                                       | 60-month mean time, months | 60-month period, % |                                                                        |
| OS                                           | 38.6                       | 64                 | 36.1                       | 60                 | 2.5 (-1.1 to 6.2)                                                     | 28.4                       | 47                 | 10.2 (6.6 to 13.9)                                                     |
| Survival after subsequent therapy initiation | 6.6                        | 11                 | 9.3                        | 15                 | -2.7 (-4.9 to -0.4)                                                   | 13.9                       | 23                 | -7.3 (-9.8 to -4.8)                                                    |
| TFS                                          | 19.7                       | 33                 | 9.9                        | 17                 | 9.8 (6.7 to 12.8)                                                     | 11.9                       | 20                 | 7.8 (4.6 to 11.0)                                                      |
| Without grade $\geq 2$ TRAE                  | 11.3                       | 19                 | 6.9                        | 12                 | 4.3 (1.7 to 7.0)                                                      | 9.4                        | 16                 | 1.9 (-0.9 to 4.8)                                                      |
| With grade $\geq 2$ TRAE                     | 8.4                        | 14                 | 3.0                        | 5                  | 5.4 (3.3 to 7.6)                                                      | 2.5                        | 4                  | 5.9 (3.7 to 8.0)                                                       |
| Time on protocol therapy                     | 12.3                       | 21                 | 16.9                       | 28                 | -4.6 (-7.3 to -1.8)                                                   | 2.6                        | 4                  | 9.8 (7.9 to 11.6)                                                      |
| With grade $\geq 2$ TRAE                     | 5.0                        | 8                  | 4.5                        | 8                  | 0.5 (-1.3 to 2.2)                                                     | 0.4                        | 1                  | 4.5 (3.3 to 5.8)                                                       |
| Without grade $\geq 2$ TRAE                  | 7.3                        | 12                 | 12.4                       | 21                 | -5.0 (-7.1 to -2.9)                                                   | 2.1                        | 4                  | 5.2 (3.9 to 6.6)                                                       |
